# Supplementary material for: Rab14 regulation of claudin-2 trafficking modulates epithelial permeability and lumen morphogenesis
Source: PubMed Central journal article supplement — Mol Biol Cell. 2014 Jun 1;25(11):1744–54. doi: 10.1091/mbc.E13-12-0724 (PMC4038501; doi:10.1091/mbc.e13-12-0724), 2014-06-01

# Supplemental Materials

*Molecular Biology of the Cell*

Lu et al.

**Supplemental Figure 1.** A. Expression of Rab14-WT, Rab14-Q70L or Rab14-S25N slightly but significantly increases the TER of MDCK monolayers. B. Claudin-1 does not colocalize with Rab11 or Rab13. Scale bar, 10 $\mu$ m. \*p < 0.01.

**Supplemental Figure 2.** Cells expressing Rab14-GFP were plated on Transwell filters and grown for 7 days, followed by fixation and labeling for the tight junction proteins indicated. Puncta of claudins -1, -2, and -4 colocalize with Rab14-GFP at the cell periphery (arrows). There is no colocalization with occludin. Scale bar, 10 $\mu$ m.

**Supplemental Figure 3.** A. Western blot analysis of expression levels of Rab14-GFP compared to endogenous Rab14. Over-expressed Rab14-GFP or mutant forms constitutes less than thirty percent of the total Rab14. B. Expression of Rab14-GFP, Rab14Q70L-GFP results in decreased claudin-2. There is no change observed in claudin-2 levels with Rab14S25N-GFP overexpression. These small changes are likely due to the presence of substantial functional endogenous protein.

**A**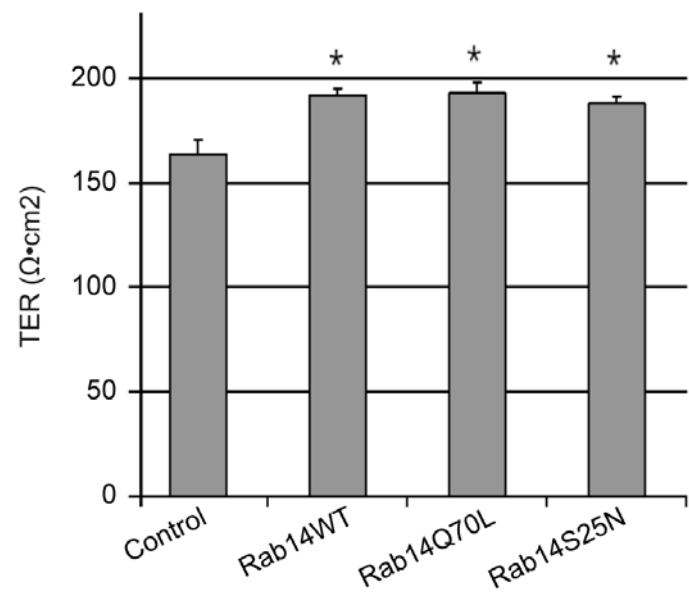**B**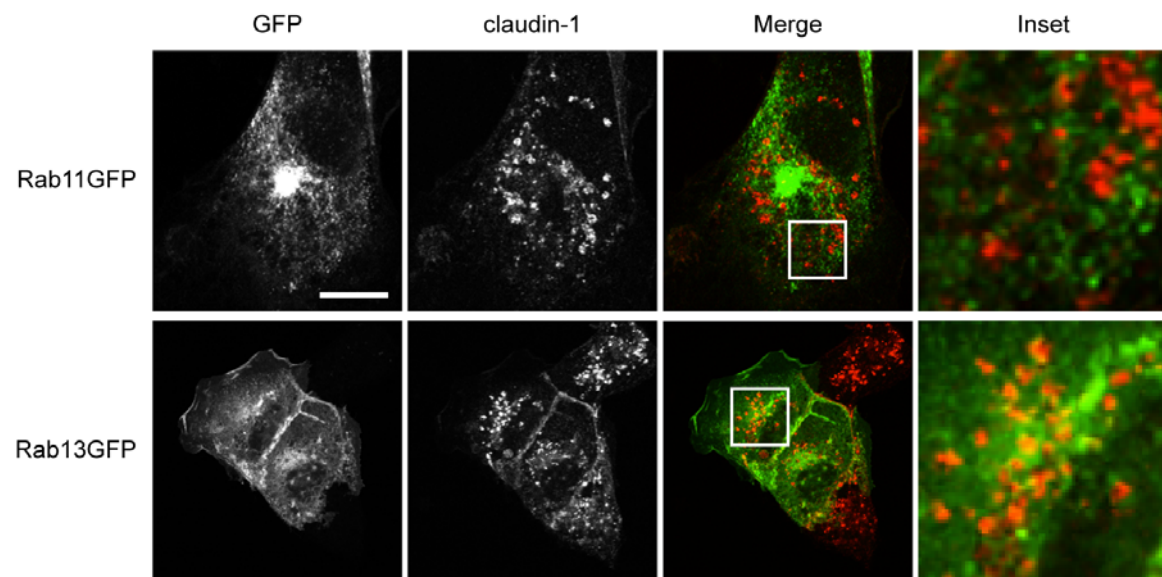

Rab14GFP

claudin-1

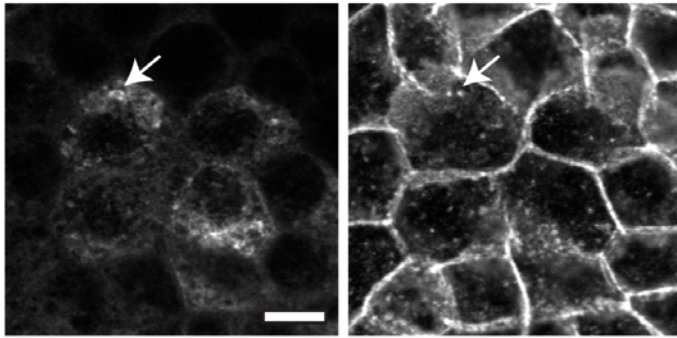

claudin-2

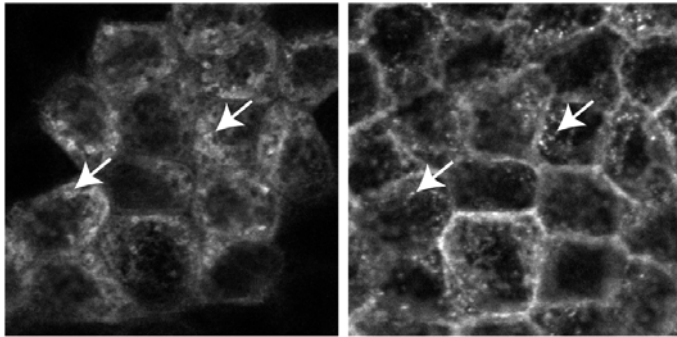

claudin-4

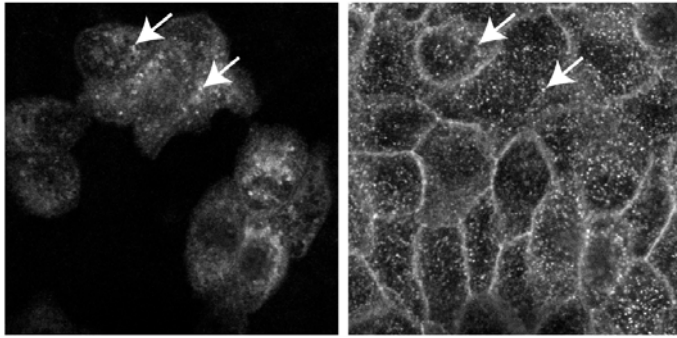

occludin

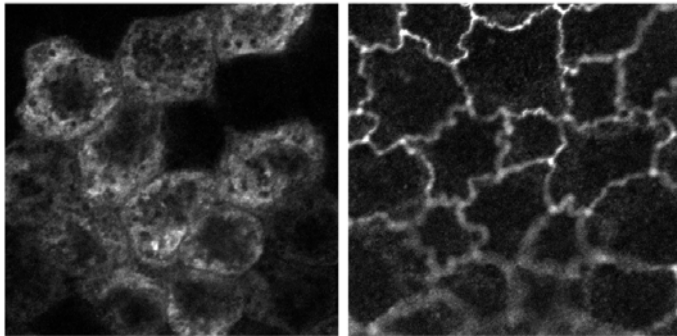

**A**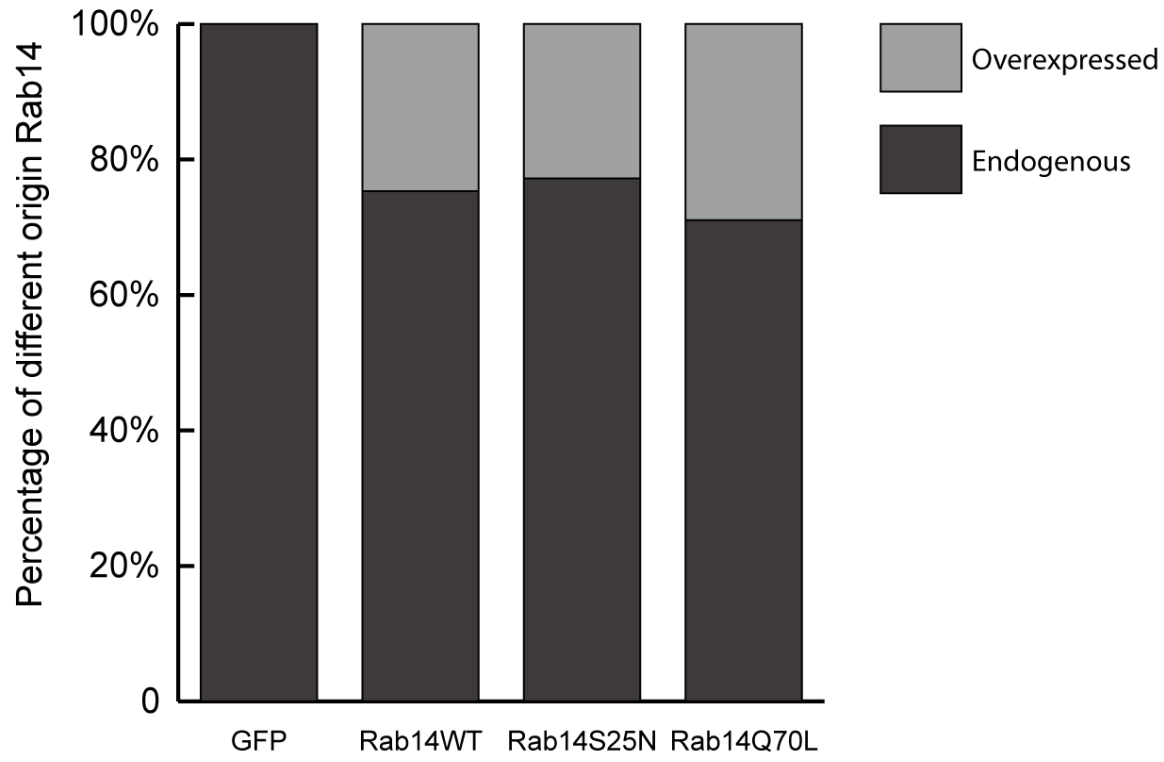**B**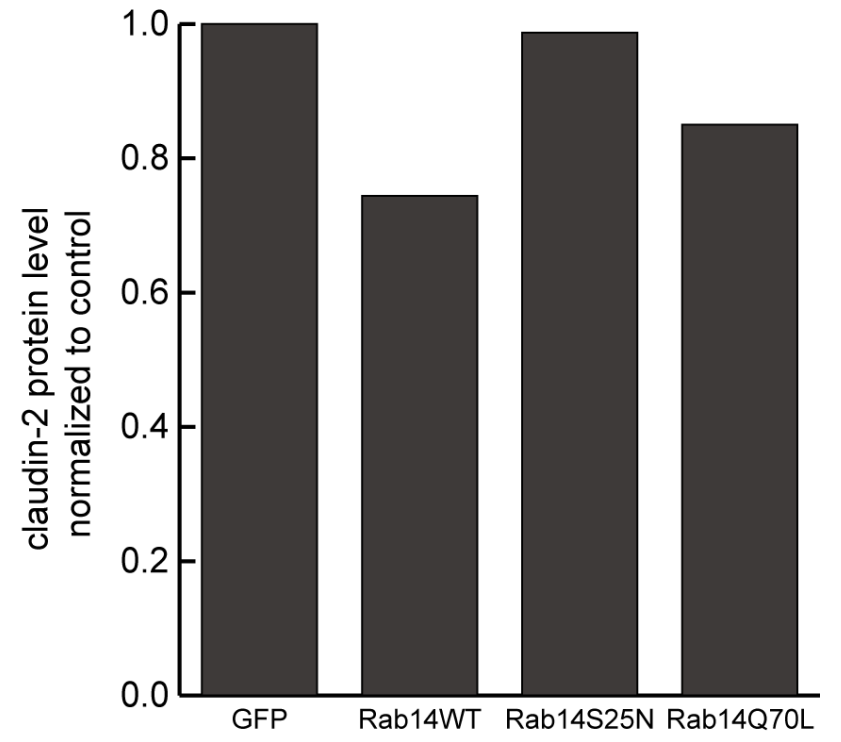

Supplement: supp_E13-12-0724v1_CombinedSupMats.pdf [file supp_E13-12-0724v1_CombinedSupMats.pdf]
